# Supplementary material for: Impact of copper toxicity on stone-head cabbage (Brassica oleracea var. capitata) in hydroponics
Source: PeerJ. 2015 Aug 4;3:e1119. doi: 10.7717/peerj.1119 (PMC4540024; doi:10.7717/peerj.1119)
Supplement: Supplemental Information 1 [file peerj-03-1119-s001.xlsx]

## Sheet: Sheet1
	Shoot Biomass			Root Biomass			Shoot/Root ratio			Thiol Shoot			Thiol Root
Cu µM	Mean	STDEV		Mean	STDEV		Mean	STDEV		Mean	STDEV		Mean	STDEV			Cu µM	Shoot Biomass (g FW)	Root Biomass (g FW)	Shoot/Root ratio
0	4.80074	0.563212		0.628	0.10376		7.67729	0.470639		0.431379	0.0142463		0.403456	0.0284926			0	4.80074	0.628	7.67729
2	3.38515	0.497691		0.51137	0.136496		6.84157	1.26797		0.451324	0.0113971		0.965331	0.0205147			2	3.38515	0.51137	6.84157
5	2.36519	0.195332		0.36837	0.0495226		6.52619	1.08735		0.472978	0.00227941		1.30097	0.00170956			5	2.36519	0.36837	6.52619
10	1.11941	0.242576		0.136926	0.0383068		8.18005	0.646545		0.598915	0.023364		1.41267	0.0598346			10	1.11941	0.136926	8.18005
	NO3-Shoot			NO3-Root			SO4-Shoot			SO4-Root			N/S ratio			N/S ratio
Cu µM	Mean	STDEV		Mean	STDEV		Mean	STDEV		Mean	STDEV		Mean	STDEV		Mean	STDEV
0	75.2673	7.12075		34.3213	3.6775		14.5863	1.70065		12.0643	0.987224		5.17876	0.436576		2.84188	0.130452
2	74.167	0.26709		33.3413	2.3922		19.8547	1.33731		12.4533	0.933468		3.74694	0.254968		2.68053	0.149465
5	57.1833	6.40743		28.5753	1.15553		27.173	0.489682		10.934	0.432043		2.10537	0.243222		2.61341	0.0189397
10	67.4113	11.5235		27.6123	1.72467		32.33	1.3357		12.1457	1.33969		2.0878	0.378114		2.28124	0.106549
	Chl (a+b)			Carotenoids			chl a/b			Chl/Car			DMC-Shoot			DMC-Root
Cu µM	Mean	STDEV		Mean	STDEV		Mean	STDEV		Mean	STDEV		Mean	STDEV		Mean	STDEV
0	0.653867	0.0158738		0.213809	0.00385933		4.13427	0.14491		3.05803	0.0318143		8.6655	0.3356		7.75055	0.674626
2	0.477789	0.0399866		0.160662	0.0164488		4.5426	0.209134		2.97762	0.0581126		8.74742	0.178815		8.42417	0.182275
5	0.286861	0.0618181		0.107887	0.0198818		4.32337	0.365965		2.64975	0.0840401		10.8291	1.26208		8.69766	0.319656		Cu µM	Root-DMC (%)	Shoot-DMC (%)
10	0.133249	0.0317495		0.0598962	0.00860907		3.48611	0.158027		2.20563	0.2023		13.3449	0.0891313		9.79425	0.370848		0	7.75055	8.6655
																			2	8.42417	8.74742
																			5	8.69766	10.8291
																			10	9.79425	13.3449
	Cu µM	Chl a+b (mg g-1 FW)	Carotenoids (mg g-1 FW)			Cu µM	Chl a/b	Chl/Car
	0	0.653867	0.213809			0	4.13427	3.05803								0	2	5	10
	2	0.477789	0.160662			2	4.5426	2.97762								7.75055	8.42417	8.69766	9.79425
	5	0.286861	0.107887			5	4.32337	2.64975								8.6655	8.74742	10.8291	13.3449
	10	0.133249	0.0598962			10	3.48611	2.20563
	NO3-Shoot			NO3-Root			SO4-Shoot			SO4-Root
Cu µM	Mean	STDEV		Mean	STDEV		Mean	STDEV		Mean	STDEV
0	75.2673	7.12075		34.3213	3.6775		14.5863	1.70065		12.0643	0.987224
2	74.167	0.26709		33.3413	2.3922		19.8547	1.33731		12.4533	0.933468
5	57.1833	6.40743		28.5753	1.15553		27.173	0.489682		10.934	0.432043
10	67.4113	11.5235		27.6123	1.72467		32.33	1.3357		12.1457	1.33969
		Cu µM	Nitrate in shoot (µM g-1 FW)	Nitrate in root (µM g-1 FW)	Sulphate in shoot (µM g-1 FW)	Sulphate in root (µM g-1 FW)
		0	75.2673	34.3213	14.5863	12.0643
		2	74.167	33.3413	19.8547	12.4533
		5	57.1833	28.5753	27.173	10.934
		10	67.4113	27.6123	32.33	12.1457
		N/S ratio			N/S ratio
		Mean	STDEV		Mean	STDEV			Cu µM	N/S ratio in shoot	N/S ratio in root
		5.17876	0.436576		2.84188	0.130452			0	5.17876	2.84188
		3.74694	0.254968		2.68053	0.149465			2	3.74694	2.68053
		2.10537	0.243222		2.61341	0.0189397			5	2.10537	2.61341
		2.0878	0.378114		2.28124	0.106549			10	2.0878	2.28124
		Thiol Shoot			Thiol Root
		Mean	STDEV		Mean	STDEV
		0.431379	0.0142463		0.403456	0.0284926
		0.451324	0.0113971		0.965331	0.0205147
		0.472978	0.00227941		1.30097	0.00170956
		0.598915	0.023364		1.41267	0.0598346
		Cu µM	Thiol in shoot (µM g-1 FW)	Thiol in root (µM g-1 FW)
		0	0.431379	0.0284926
		2	0.451324	0.0205147
		5	0.472978	0.00170956
		10	0.598915	0.0598346
	Figure 1										Figure 2									Figure 3
																			Figure 4.1
	Figure 4										Figure 5											Figure 6
	Figure 7
